# Supplementary material for: Prominent role for T cell-derived Tumour Necrosis Factor for sustained control of Mycobacterium tuberculosis infection
Source: PubMed Central journal article supplement — Sci Rep. 2013 May 9;3:1809. doi: 10.1038/srep01809 (PMC3648802; doi:10.1038/srep01809), 2013-05-09
Supplement: srep01809-s1.pdf [file srep01809-s1.pdf]

## **SUPPLEMENTARY INFORMATION**

### **Prominent role for T cell-derived Tumour Necrosis Factor for sustained control of *Mycobacterium tuberculosis* infection.**

---

<sup>1</sup>Nasiema Allie, <sup>2,3,4</sup>Sergei I. Grivennikov, , <sup>1</sup>Roanne Keeton, <sup>1</sup>Nai-Jen Hsu, <sup>2,3</sup>Marie-Laure Bourigault, <sup>2,3</sup>Nathalie Court, <sup>2,3</sup>Cecile Fremond, <sup>2,3</sup>Vladimir Yermeev, <sup>4,5</sup>Yuriy Shebzukhov <sup>2,3</sup>Bernhard Ryffel, <sup>\*4,5</sup>Sergei A. Nedospasov <sup>\*2,3</sup>Valerie F.J. Quesniaux, <sup>\*1,6</sup>Muazzam Jacobs.

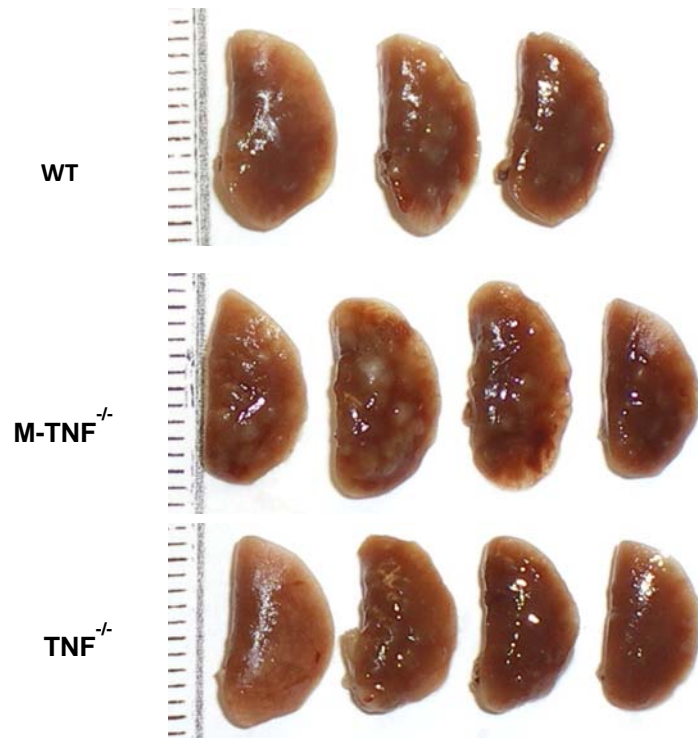

**Supplementary Figure. 1**

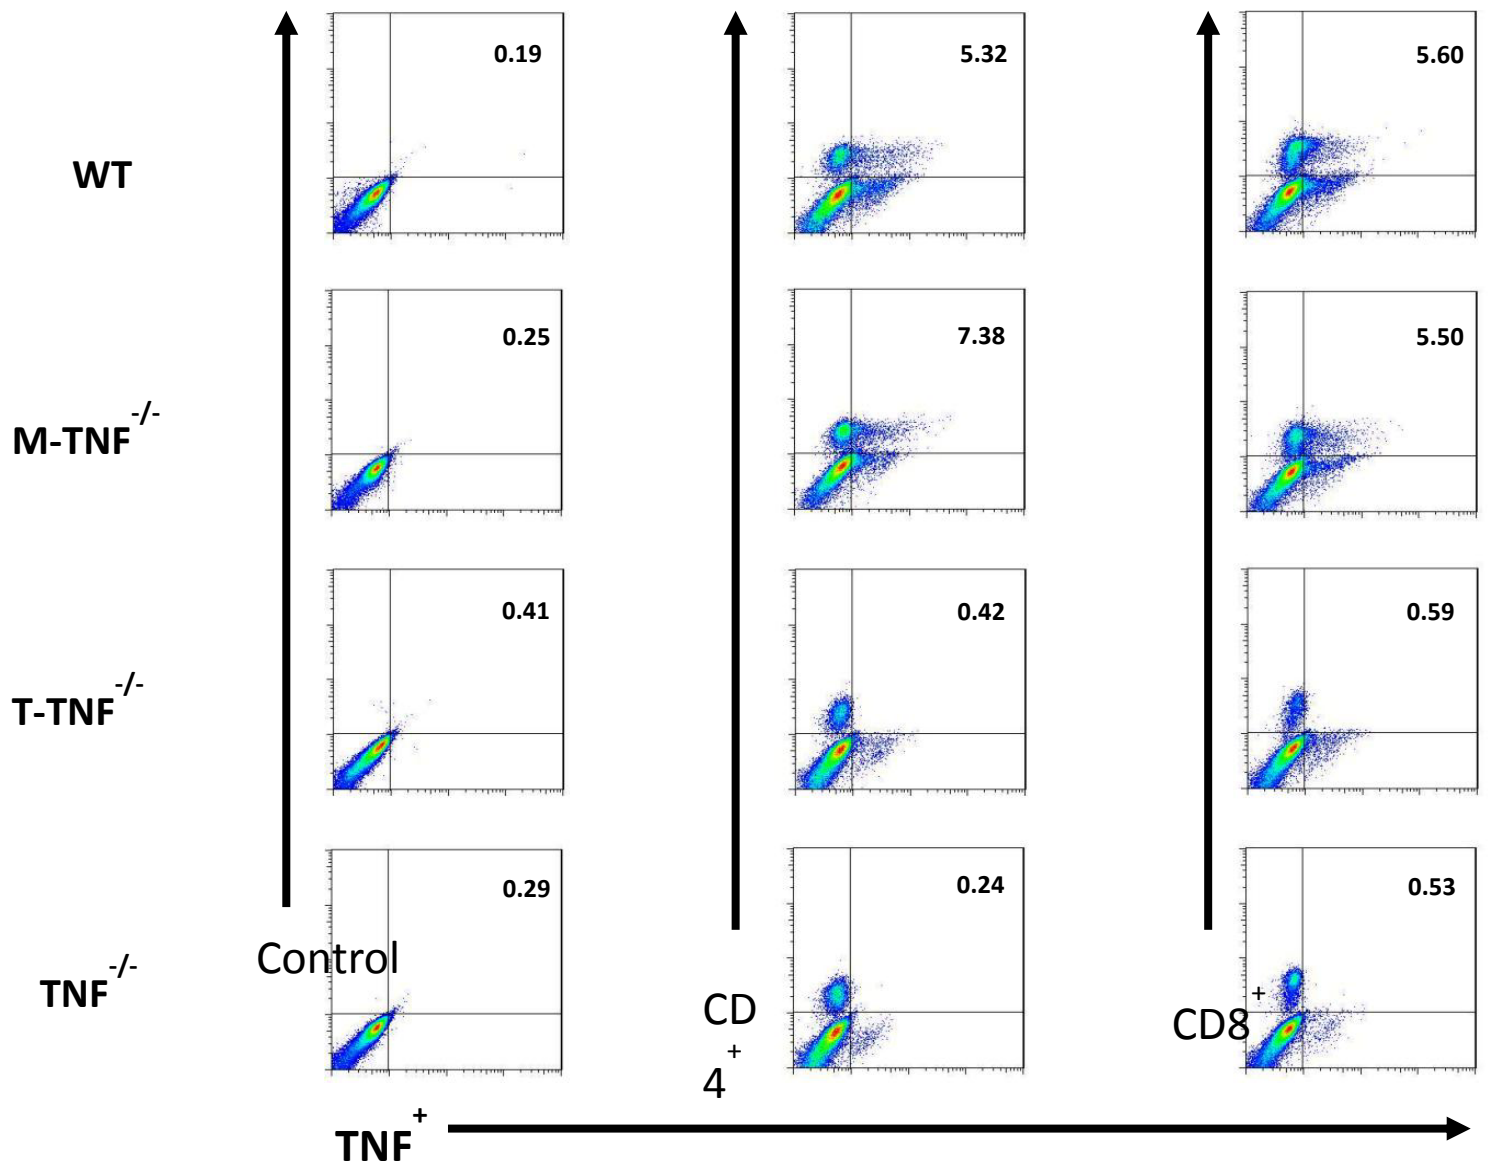

Supplementary Figure 2

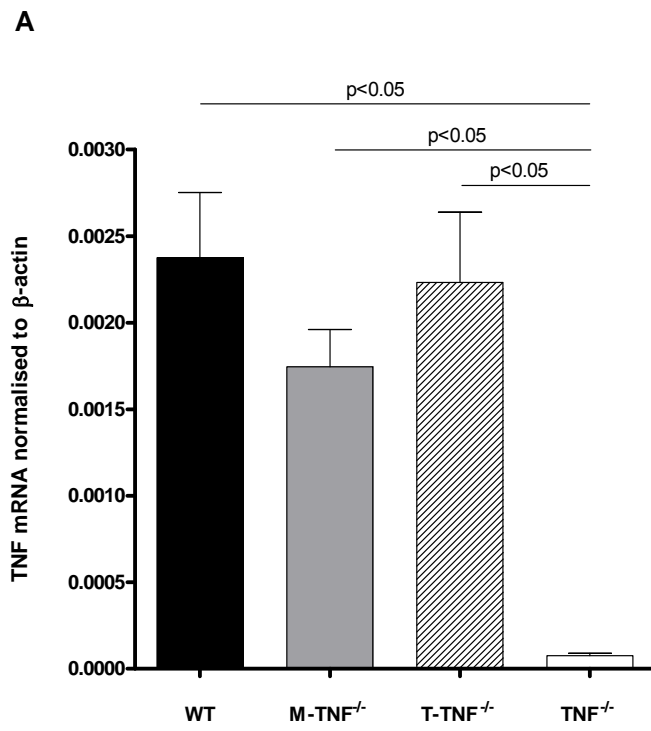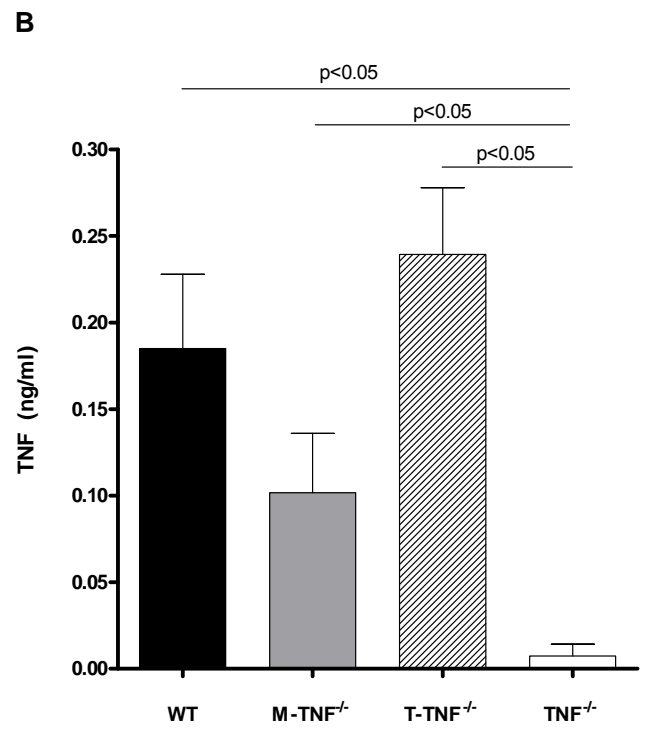

Supplementary Figure 3

| Primer name | Sequence                  |
|-------------|---------------------------|
| ATF3-F      | CAGACCCCTggAgATgTCAGT     |
| ATF3-R      | TTCTTgTTTCgACACTTggCA     |
| b-Actin-F   | CTCCTgAgCgCAAgtACTCTgTg   |
| b-Actin-R   | TAAACgCAgCTCAgTAACAgTCC   |
| CD8a-F      | CTTCAGTTCTgTCgTgCCAgt     |
| CD8a-R      | CAGgCgAAgTCCAATCCg        |
| CXCL3-F     | gATCCATCCCAACggTgTCT      |
| CXCL3-R     | AAgTAgATgCAATTATACCCgTAg  |
| Cxcl5_F     | CgCTAATTTggAggTgATCC      |
| Cxcl5_R     | gTgCATTCcCgCTTAgCTTTC     |
| GZMA-F      | ggggCTCACTCAATCAATAAgg    |
| GZMA-R      | ggTAggTgAAgATAgCCACAT     |
| Ifng_F      | gCTTTgCAgCTCTTCCTCAT      |
| Ifng_R      | gTCACCATCCTTTTgCCAgt      |
| IL17a-F     | TTTAACTCCCTTggCgCAAAA     |
| IL17a-R     | CTTCCCTCCgCATTgACAC       |
| IL1b-F      | TgTgAAATgCCACCTTTTgA      |
| IL1b-R      | ggTCAAAggTTTggAAgCAg      |
| IL6-F       | ATCTACTCggCAAACCTAgTg     |
| IL6-R       | TgTCCCAACATTCATATTgT      |
| iNOS-F      | gTTCTCAgCCCAACAATACAAGA   |
| iNOS-R      | gTggACgggTCgATgTCAC       |
| Irf7-F      | ACAgCACAgggCgTTTTATCT     |
| Irf7-R      | TCTCCCTATTTCCgTggCT       |
| LRG47_F     | ggTgTCCTgggCAACTAAgA      |
| LRG47_R     | TTCAgCAggTAgCCCAgAgT      |
| S100a9_F    | CAgCATAACCACCATCATCg      |
| S100a9_R    | CTgATTgTCCTggTTTgTg       |
| SAA3-F      | CCAgAAgAggAgCAACTACT      |
| SAA3-R      | AgTATTTATTCAGCACATTgggATg |

**Supplementary Table 1.**

## **SUPPLEMENTARY FIGURES/TABLE LEGENDS**

### **Supplementary Figure 1: TNF from myeloid cells regulates cellular recruitment for granuloma formation but is dispensable for initiation and maintenance of granuloma structure.**

WT (black), M-TNF<sup>-/-</sup> (grey), and TNF<sup>-/-</sup> (clear) mice were infected with *M. tuberculosis* H37Rv as described under “Materials and Methods” and macroscopic pathology assessed at 28 days post infection (one of three independent experiments; n=3-4 mice/strain).

### **Supplementary Figure 2: TNF synthesis by pulmonary T cells isolated from infected mice.**

TNF expression by lung infiltrating CD4<sup>+</sup> or CD8<sup>+</sup>T cells was analyzed by flow cytometry 21 days post-infection. Figures represent the percentage of either CD4<sup>+</sup> or CD8<sup>+</sup> T cells that expressed TNF and compared to cells stained with appropriate isotype controls. Data is from one experiment representative of two independent experiment

### **Supplementary Figure 3: Analysis of pulmonary TNF mRNA and protein expression in *M. tuberculosis* infected complete and cell-specific TNF deficient mice.**

A. TNF mRNA expression, analysed by quantitative RT-PCR at 28 days post-infection in *M. tuberculosis* infected WT-, M-TNF<sup>-/-</sup>-, T-TNF<sup>-/-</sup>- or TNF<sup>-/-</sup> mice, normalized to  $\beta$ -actin. Primers used for TNF: Forward CAgCCTCTTCTCATTCTgC, reverse ggTCTgggCCATAgAACTgA. The data represents the mean and standard deviation of n=12 mice per genotype from 2 independent experiments.

B. Pulmonary TNF protein expression analysed by ELISA in WT-, M-TNF<sup>-/-</sup>-, T-TNF<sup>-/-</sup>- or TNF<sup>-/-</sup> mice 28 days post infection. The data represents the mean and standard deviation of combined results from 2 independent experiments (n=8-10/mice)

**Supplementary Table 1 Legend:** Primers used for quantitative PCR
